# Supplementary material
Source: publisher figshare collection journal article supplement (https://acs.figshare.com/ndownloader/files/5882145)
Supplement: Supplementary file 1 [file 5882145]

# om020495w.cif

--------------002F8B12720071DF575324BE
Content-Type: text/plain; charset=us-ascii; x-mac-type="54455854"; x-mac-creator="4D535744";
 name="CIF's of OM0020495W"
Content-Transfer-Encoding: 7bit
Content-Description: Unknown Document
Content-Disposition: inline;
 filename="CIF's of OM0020495W"


data_for 1

_audit_creation_method            SHELXL-97
_chemical_name_systematic
;
 ?
;
_chemical_name_common             ?
_chemical_formula_moiety          ?
_chemical_formula_sum
 'C43 H22 Co5 Fe O17 P'
_chemical_formula_weight          1192.08

loop_
 _atom_type_symbol
 _atom_type_description
 _atom_type_scat_dispersion_real
 _atom_type_scat_dispersion_imag
 _atom_type_scat_source
 'C'  'C'   0.0033   0.0016
 'International Tables Vol C Tables 4.2.6.8 and 6.1.1.4'
 'H'  'H'   0.0000   0.0000
 'International Tables Vol C Tables 4.2.6.8 and 6.1.1.4'
 'O'  'O'   0.0106   0.0060
 'International Tables Vol C Tables 4.2.6.8 and 6.1.1.4'
 'P'  'P'   0.1023   0.0942
 'International Tables Vol C Tables 4.2.6.8 and 6.1.1.4'
 'Fe'  'Fe'   0.3463   0.8444
 'International Tables Vol C Tables 4.2.6.8 and 6.1.1.4'
 'Co'  'Co'   0.3494   0.9721
 'International Tables Vol C Tables 4.2.6.8 and 6.1.1.4'

_symmetry_cell_setting            ?
_symmetry_space_group_name_H-M    ?

loop_
 _symmetry_equiv_pos_as_xyz
 'x, y, z'
 '-x, y+1/2, -z+1/2'
 '-x, -y, -z'
 'x, -y-1/2, z-1/2'

_cell_length_a                    9.7070(10)
_cell_length_b                    31.3350(10)
_cell_length_c                    15.2050(10)
_cell_angle_alpha                 90.00
_cell_angle_beta                  96.7480(10)
_cell_angle_gamma                 90.00
_cell_volume                      4592.8(6)
_cell_formula_units_Z             4
_cell_measurement_temperature     293(2)
_cell_measurement_reflns_used     ?
_cell_measurement_theta_min       ?
_cell_measurement_theta_max       ?

_exptl_crystal_description        ?
_exptl_crystal_colour             ?
_exptl_crystal_size_max           ?
_exptl_crystal_size_mid           ?
_exptl_crystal_size_min           ?
_exptl_crystal_density_meas       ?
_exptl_crystal_density_diffrn     1.724
_exptl_crystal_density_method     'not measured'
_exptl_crystal_F_000              2368
_exptl_absorpt_coefficient_mu     2.178
_exptl_absorpt_correction_type    ?
_exptl_absorpt_correction_T_min   ?
_exptl_absorpt_correction_T_max   ?

_exptl_special_details
;
 ?
;

_diffrn_ambient_temperature       293(2)
_diffrn_radiation_wavelength      0.71069
_diffrn_radiation_type            MoK\a
_diffrn_radiation_source          'fine-focus sealed tube'
_diffrn_radiation_monochromator   graphite
_diffrn_measurement_device_type   ?
_diffrn_measurement_method        ?
_diffrn_detector_area_resol_mean  ?
_diffrn_standards_number          ?
_diffrn_standards_interval_count  ?
_diffrn_standards_interval_time   ?
_diffrn_standards_decay_%         ?
_diffrn_reflns_number             10650
_diffrn_reflns_av_R_equivalents   0.0446
_diffrn_reflns_av_sigmaI/netI     0.0522
_diffrn_reflns_limit_h_min        0
_diffrn_reflns_limit_h_max        13
_diffrn_reflns_limit_k_min        0
_diffrn_reflns_limit_k_max        41
_diffrn_reflns_limit_l_min        -9
_diffrn_reflns_limit_l_max        9
_diffrn_reflns_theta_min          2.48
_diffrn_reflns_theta_max          28.89
_reflns_number_total              4940
_reflns_number_gt                 2806
_reflns_threshold_expression      >2sigma(I)

_computing_data_collection        ?
_computing_cell_refinement        ?
_computing_data_reduction         ?
_computing_structure_solution     'SHELXS-97 (Sheldrick, 1990)'
_computing_structure_refinement   'SHELXL-97 (Sheldrick, 1997)'
_computing_molecular_graphics     ?
_computing_publication_material   ?

_refine_special_details
;
 Refinement of F^2^ against ALL reflections.  The weighted R-factor wR and
 goodness of fit S are based on F^2^, conventional R-factors R are based
 on F, with F set to zero for negative F^2^. The threshold expression of
 F^2^ > 2sigma(F^2^) is used only for calculating R-factors(gt) etc. and is
 not relevant to the choice of reflections for refinement.  R-factors based
 on F^2^ are statistically about twice as large as those based on F, and R-
 factors based on ALL data will be even larger.
;

_refine_ls_structure_factor_coef  Fsqd
_refine_ls_matrix_type            full
_refine_ls_weighting_scheme
 'calc w=1/[\s^2^(Fo^2^)+(0.0923P)^2^+0.0000P] where P=(Fo^2^+2Fc^2^)/3'
_atom_sites_solution_primary      direct
_atom_sites_solution_secondary    difmap
_atom_sites_solution_hydrogens    geom
_refine_ls_hydrogen_treatment     mixed
_refine_ls_extinction_method      none
_refine_ls_extinction_coef        ?
_refine_ls_extinction_expression
'Fc'
_refine_ls_number_reflns          4940
_refine_ls_number_parameters      608
_refine_ls_number_restraints      0
_refine_ls_R_factor_all           0.1160
_refine_ls_R_factor_gt            0.0524
_refine_ls_wR_factor_ref          0.1525
_refine_ls_wR_factor_gt           0.1311
_refine_ls_goodness_of_fit_ref    1.052
_refine_ls_restrained_S_all       1.052
_refine_ls_shift/su_max           0.000
_refine_ls_shift/su_mean          0.000

loop_
 _atom_site_label
 _atom_site_type_symbol
 _atom_site_fract_x
 _atom_site_fract_y
 _atom_site_fract_z
 _atom_site_U_iso_or_equiv
 _atom_site_adp_type
 _atom_site_occupancy
 _atom_site_calc_flag
 _atom_site_refinement_flags
 _atom_site_disorder_assembly
 _atom_site_disorder_group
Co1 Co 1.16383(10) 0.09142(3) 0.91966(13) 0.0512(6) Uani 1 d . . .
Co2 Co 1.08404(9) 0.12072(3) 0.76788(10) 0.0495(5) Uani 1 d . . .
Co3 Co 0.94833(9) 0.19213(3) 0.79169(10) 0.0515(6) Uani 1 d . . .
Co4 Co 0.87632(10) 0.19482(3) 0.94652(10) 0.0489(5) Uani 1 d . . .
Co5 Co 0.72109(9) 0.16315(4) 0.82232(11) 0.0550(6) Uani 1 d . . .
Fe Fe 0.96835(10) 0.05424(4) 0.82132(11) 0.0528(6) Uani 1 d . . .
P P 1.25518(19) 0.11228(7) 0.3970(2) 0.0468(10) Uani 1 d . . .
O3 O 1.3642(7) 0.0263(2) 0.8819(7) 0.132(4) Uani 1 d . . .
O5 O 1.1106(11) 0.0745(4) 1.1014(9) 0.098(5) Uani 1 d . . .
O6 O 1.3621(6) 0.1350(3) 0.7204(6) 0.106(3) Uani 1 d . . .
O4 O 1.3400(6) 0.1667(2) 0.9474(5) 0.081(3) Uani 1 d . . .
O7 O 1.0362(7) 0.0592(3) 0.6306(7) 0.078(4) Uani 1 d . . .
O8 O 0.9784(8) 0.1675(3) 0.6125(7) 0.083(4) Uani 1 d . . .
O9 O 1.2035(6) 0.2416(2) 0.8241(6) 0.112(3) Uani 1 d . . .
O10 O 0.7968(8) 0.2561(3) 0.6831(7) 0.119(4) Uani 1 d . . .
O11 O 1.1128(7) 0.1871(2) 1.0820(6) 0.095(3) Uani 1 d . . .
O12 O 0.8550(9) 0.2864(2) 0.9195(7) 0.130(4) Uani 1 d . . .
O13 O 0.6597(7) 0.1774(3) 1.0573(6) 0.100(3) Uani 1 d . . .
O14 O 0.5245(7) 0.2360(2) 0.8050(6) 0.109(3) Uani 1 d . . .
O15 O 0.5896(7) 0.0946(2) 0.9132(6) 0.095(3) Uani 1 d . . .
O16 O 0.6780(8) 0.1287(3) 0.6423(7) 0.091(4) Uani 1 d . . .
O17 O 1.1069(7) -0.0254(2) 0.7806(6) 0.106(3) Uani 1 d . . .
O18 O 0.8522(8) 0.0266(3) 0.9804(8) 0.092(4) Uani 1 d . . .
O19 O 0.6965(6) 0.0404(2) 0.7242(6) 0.101(3) Uani 1 d . . .
C1 C 0.9844(7) 0.1112(3) 0.8699(7) 0.049(3) Uani 1 d . . .
C2 C 0.9062(6) 0.1471(2) 0.8739(7) 0.051(3) Uani 1 d . . .
C3 C 1.2873(8) 0.0522(3) 0.8943(8) 0.078(4) Uani 1 d . . .
C4 C 1.2709(8) 0.1383(3) 0.9343(7) 0.056(3) Uani 1 d . . .
C5 C 1.1308(12) 0.0797(4) 1.0329(13) 0.063(8) Uani 1 d . . .
C6 C 1.2538(9) 0.1300(3) 0.7358(7) 0.055(3) Uani 1 d . . .
C7 C 1.0382(9) 0.0750(4) 0.6986(11) 0.064(5) Uani 1 d . . .
C8 C 0.9988(9) 0.1594(3) 0.6890(10) 0.057(5) Uani 1 d . . .
C9 C 1.1097(9) 0.2210(3) 0.8140(7) 0.063(4) Uani 1 d . . .
C10 C 0.8537(8) 0.2311(3) 0.7264(8) 0.067(4) Uani 1 d . . .
C11 C 1.0225(8) 0.1902(3) 1.0275(8) 0.055(4) Uani 1 d . . .
C12 C 0.8634(9) 0.2502(3) 0.9272(8) 0.078(4) Uani 1 d . . .
C13 C 0.7461(9) 0.1844(3) 1.0163(8) 0.055(4) Uani 1 d . . .
C14 C 0.6010(8) 0.2081(4) 0.8130(8) 0.081(4) Uani 1 d . . .
C15 C 0.6349(8) 0.1222(3) 0.8780(8) 0.060(4) Uani 1 d . . .
C16 C 0.6979(9) 0.1427(3) 0.7106(11) 0.060(5) Uani 1 d . . .
C17 C 1.0532(9) 0.0048(3) 0.7979(8) 0.070(4) Uani 1 d . . .
C18 C 0.9003(10) 0.0374(3) 0.9204(10) 0.068(5) Uani 1 d . . .
C19 C 0.8040(9) 0.0470(3) 0.7600(8) 0.069(4) Uani 1 d . . .
C20 C 1.3209(8) 0.1586(2) 0.4568(7) 0.043(3) Uani 1 d . . .
C21 C 1.2349(9) 0.1841(3) 0.5004(8) 0.068(4) Uani 1 d . . .
H21 H 1.1401 0.1787 0.4946 0.082 Uiso 1 calc R . .
C22 C 1.2885(12) 0.2172(3) 0.5517(8) 0.088(4) Uani 1 d . . .
H22 H 1.2305 0.2332 0.5834 0.105 Uiso 1 calc R . .
C23 C 1.4273(15) 0.2270(4) 0.5572(10) 0.097(5) Uani 1 d . . .
H23 H 1.4631 0.2496 0.5922 0.117 Uiso 1 calc R . .
C24 C 1.5100(13) 0.2038(5) 0.5120(11)0.103(5) Uani 1 d . . .
H24 H 1.6032 0.2112 0.5150 0.124 Uiso 1 calc R . .
C25 C 1.4624(9) 0.1688(3) 0.4603(7) 0.071(4) Uani 1 d . . .
H25 H 1.5219 0.1529 0.4295 0.085 Uiso 1 calc R . .
C26 C 1.3444(7) 0.1058(3) 0.3028(8) 0.056(3) Uani 1 d . . .
C27 C 1.3639(10) 0.1411(3) 0.2498(10) 0.062(4) Uani 1 d . . .
H27 H 1.3328 0.1679 0.2652 0.074 Uiso 1 calc R . .
C28 C 1.4286(11) 0.1365(4) 0.1754(10) 0.073(4) Uani 1 d . . .
H28 H 1.4418 0.1603 0.1408 0.087 Uiso 1 calc R . .
C29 C 1.4751(10) 0.0968(6) 0.1504(10) 0.098(5) Uani 1 d . . .
H29 H 1.5187 0.0940 0.0994 0.117 Uiso 1 calc R . .
C30 C 1.4559(10) 0.0622(4) 0.2018(11) 0.078(5) Uani 1 d . . .
H30 H 1.4851 0.0354 0.1851 0.093 Uiso 1 calc R . .
C31 C 1.3919(9) 0.0665(3) 0.2802(9) 0.062(4) Uani 1 d . . .
H31 H 1.3821 0.0430 0.3161 0.03(2) Uiso 1 calc R . .
C32 C 1.2787(7) 0.0669(2) 0.4665(7) 0.045(3) Uani 1 d . . .
C33 C 1.3734(8) 0.0669(3) 0.5427(8) 0.057(4) Uani 1 d . . .
H33 H 1.4270 0.0910 0.5574 0.09(3) Uiso 1 calc R . .
C34 C 1.3880(9) 0.0319(3) 0.5958(8) 0.077(4) Uani 1 d . . .
H34 H 1.4504 0.0326 0.6472 0.07(3) Uiso 1 calc R . .
C35 C 1.3124(9) -0.0045(3) 0.5752(9) 0.081(4) Uani 1 d . . .
H35 H 1.3256 -0.0283 0.6118 0.06(3) Uiso 1 calc R . .
C36 C 1.2179(10) -0.0060(3) 0.5012(9) 0.082(5) Uani 1 d . . .
H36 H 1.1645 -0.0303 0.4876 0.099 Uiso 1 calc R . .
C37 C 1.2041(8) 0.0291(3) 0.4479(8) 0.058(3) Uani 1 d . . .
H37 H 1.1419 0.0279 0.3966 0.069 Uiso 1 calc R . .
C38 C 1.0720(9) 0.1177(3) 0.3627(10) 0.057(4) Uani 1 d . . .
C39 C 1.0223(9) 0.1291(3) 0.2791(9) 0.065(4) Uani 1 d . . .
H39 H 1.0838 0.1345 0.2379 0.079 Uiso 1 calc R . .
C40 C 0.8807(10) 0.1326(3) 0.2541(9) 0.078(4) Uani 1 d . . .
H40 H 0.8466 0.1399 0.1963 0.093 Uiso 1 calc R . .
C41 C 0.7919(10) 0.1251(3) 0.3161(10) 0.063(5) Uani 1 d . . .
H41 H 0.6968 0.1276 0.2997 0.075 Uiso 1 calc R . .
C42 C 0.8393(9) 0.1141(3) 0.4021(9) 0.062(4) Uani 1 d . . .
H42 H 0.7775 0.1097 0.4436 0.074 Uiso 1 calc R . .
C43 C 0.9832(8) 0.1095(3) 0.4259(8) 0.053(3) Uani 1 d . . .
H43 H 1.0181 0.1012 0.4828 0.064 Uiso 1 calc R . .


_geom_special_details
;
 All esds (except the esd in the dihedral angle between two l.s. planes)
 are estimated using the full covariance matrix.  The cell esds are taken
 into account individually in the estimation of esds in distances, angles
 and torsion angles; correlations between esds in cell parameters are only
 used when they are defined by crystal symmetry.  An approximate (isotropic)
 treatment of cell esds is used for estimating esds involving l.s. planes.
;

loop_
 _geom_bond_atom_site_label_1
 _geom_bond_atom_site_label_2
 _geom_bond_distance
 _geom_bond_site_symmetry_2
 _geom_bond_publ_flag
Co1 C3 1.790(10) . ?
Co1 C4 1.799(10) . ?
Co1 C5 1.825(19) . ?
Co1 C1 1.918(8) . ?
Co1 Co2 2.520(2) . ?
Co1 Fe 2.5547(16) . ?
Co2 C6 1.796(10) . ?
Co2 C7 1.802(12) . ?
Co2 C8 1.833(12) . ?
Co2 C1 1.945(9) . ?
Co2 Fe 2.5447(17) . ?
Co2 Co3 2.6431(15) . ?
Co3 C10 1.763(11) . ?
Co3 C9 1.806(9) . ?
Co3 C2 1.960(9) . ?
Co3 C8 1.977(14) . ?
Co3 Co5 2.4797(14) . ?
Co3 Co4 2.535(2) . ?
Co4 C12 1.763(11) . ?
Co4 C11 1.773(10) . ?
Co4 C13 1.774(11) . ?
Co4 C2 1.901(8) . ?
Co4 Co5 2.4804(18) . ?
Co5 C15 1.796(11) . ?
Co5 C16 1.805(15) . ?
Co5 C14 1.824(11) . ?
Co5 C2 1.940(7) . ?
Fe C19 1.765(10) . ?
Fe C18 1.795(14) . ?
Fe C17 1.809(10) . ?
Fe C1 1.930(8) . ?
Fe C7 2.160(16) . ?
P C32 1.771(9) . ?
P C26 1.771(11) . ?
P C20 1.789(8) . ?
P C38 1.802(9) . ?
O3 C3 1.133(10) . ?
O5 C5 1.095(17) . ?
O6 C6 1.115(9) . ?
O4 C4 1.119(9) . ?
O7 C7 1.145(13) . ?
O8 C8 1.184(13) . ?
O9 C9 1.113(9) . ?
O10 C10 1.125(10) . ?
O11 C11 1.136(10) . ?
O12 C12 1.140(11) . ?
O13 C13 1.123(11) . ?
O14 C14 1.143(10) . ?
O15 C15 1.135(10) . ?
O16 C16 1.123(14) . ?
O17 C17 1.126(10) . ?
O18 C18 1.124(14) . ?
O19 C19 1.138(9) . ?
C1 C2 1.363(10) . ?
C20 C21 1.379(12) . ?
C20 C25 1.406(11) . ?
C21 C22 1.364(13) . ?
C21 H21 0.9300 . ?
C22 C23 1.375(15) . ?
C22 H22 0.9300 . ?
C23 C24 1.333(16) . ?
C23 H23 0.9300 . ?
C24 C25 1.395(15) . ?
C24 H24 0.9300 . ?
C25 H25 0.9300 . ?
C26 C31 1.371(12) . ?
C26 C27 1.396(13) . ?
C27 C28 1.365(15) . ?
C27 H27 0.9300 . ?
C28 C29 1.392(16) . ?
C28 H28 0.9300 . ?
C29 C30 1.363(16) . ?
C29 H29 0.9300 . ?
C30 C31 1.414(15) . ?
C30 H30 0.9300 . ?
C31 H31 0.9300 . ?
C32 C33 1.392(12) . ?
C32 C37 1.399(11) . ?
C33 C34 1.360(12) . ?
C33 H33 0.9300 . ?
C34 C35 1.373(12) . ?
C34 H34 0.9300 . ?
C35 C36 1.366(13) . ?
C35 H35 0.9300 . ?
C36 C37 1.364(12) . ?
C36 H36 0.9300 . ?
C37 H37 0.9300 . ?
C38 C39 1.352(14) . ?
C38 C43 1.388(14) . ?
C39 C40 1.388(12) . ?
C39 H39 0.9300 . ?
C40 C41 1.371(15) . ?
C40 H40 0.9300 . ?
C41 C42 1.378(14) . ?
C41 H41 0.9300 . ?
C42 C43 1.409(11) . ?
C42 H42 0.9300 . ?
C43 H43 0.9300 . ?

loop_
 _geom_angle_atom_site_label_1
 _geom_angle_atom_site_label_2
 _geom_angle_atom_site_label_3
 _geom_angle
 _geom_angle_site_symmetry_1
 _geom_angle_site_symmetry_3
 _geom_angle_publ_flag
C3 Co1 C4 101.3(4) . . ?
C3 Co1 C5 105.2(6) . . ?
C4 Co1 C5 102.2(5) . . ?
C3 Co1 C1 137.4(5) . . ?
C4 Co1 C1 105.6(3) . . ?
C5 Co1 C1 100.7(5) . . ?
C3 Co1 Co2 101.2(4) . . ?
C4 Co1 Co2 85.8(3) . . ?
C5 Co1 Co2 150.2(4) . . ?
C1 Co1 Co2 49.8(3) . . ?
C3 Co1 Fe 91.8(3) . . ?
C4 Co1 Fe 145.5(3) . . ?
C5 Co1 Fe 105.0(4) . . ?
C1 Co1 Fe 48.6(3) . . ?
Co2 Co1 Fe 60.19(5) . . ?
C6 Co2 C7 98.2(5) . . ?
C6 Co2 C8 94.2(5) . . ?
C7 Co2 C8 94.7(6) . . ?
C6 Co2 C1 143.1(4) . . ?
C7 Co2 C1 103.4(5) . . ?
C8 Co2 C1 113.3(5) . . ?
C6 Co2 Co1 96.6(3) . . ?
C7 Co2 Co1 105.9(5) . . ?
C8 Co2 Co1 155.1(4) . . ?
C1 Co2 Co1 48.8(2) . . ?
C6 Co2 Fe 132.3(3) . . ?
C7 Co2 Fe 56.5(5) . . ?
C8 Co2 Fe 124.6(3) . . ?
C1 Co2 Fe 48.7(2) . . ?
Co1 Co2 Fe 60.59(5) . . ?
C6 Co2 Co3 112.8(3) . . ?
C7 Co2 Co3 131.3(3) . . ?
C8 Co2 Co3 48.4(4) . . ?
C1 Co2 Co3 73.6(2) . . ?
Co1 Co2 Co3 106.71(7) . . ?
Fe Co2 Co3 113.80(6) . . ?
C10 Co3 C9 98.2(4) . . ?
C10 Co3 C2 136.4(4) . . ?
C9 Co3 C2 118.8(4) . . ?
C10 Co3 C8 94.3(5) . . ?
C9 Co3 C8 96.8(4) . . ?
C2 Co3 C8 102.7(4) . . ?
C10 Co3 Co5 86.8(3) . . ?
C9 Co3 Co5 156.8(4) . . ?
C2 Co3 Co5 50.17(19) . . ?
C8 Co3 Co5 105.5(3) . . ?
C10 Co3 Co4 108.5(4) . . ?
C9 Co3 Co4 97.9(4) . . ?
C2 Co3 Co4 48.0(3) . . ?
C8 Co3 Co4 150.7(3) . . ?
Co5 Co3 Co4 59.28(5) . . ?
C10 Co3 Co2 138.1(4) . . ?
C9 Co3 Co2 90.8(3) . . ?
C2 Co3 Co2 67.8(2) . . ?
C8 Co3 Co2 43.9(3) . . ?
Co5 Co3 Co2 100.62(5) . . ?
Co4 Co3 Co2 110.59(6) . . ?
C12 Co4 C11 103.4(4) . . ?
C12 Co4 C13 103.9(5) . . ?
C11 Co4 C13 97.9(4) . . ?
C12 Co4 C2 133.7(5) . . ?
C11 Co4 C2 100.1(4) . . ?
C13 Co4 C2 111.7(4) . . ?
C12 Co4 Co5 104.0(4) . . ?
C11 Co4 Co5 149.5(3) . . ?
C13 Co4 Co5 88.3(3) . . ?
C2 Co4 Co5 50.5(2) . . ?
C12 Co4 Co3 84.3(4) . . ?
C11 Co4 Co3 110.9(3) . . ?
C13 Co4 Co3 147.5(3) . . ?
C2 Co4 Co3 50.0(3) . . ?
Co5 Co4 Co3 59.25(5) . . ?
C15 Co5 C16 100.2(5) . . ?
C15 Co5 C14 105.0(4) . . ?
C16 Co5 C14 101.2(5) . . ?
C15 Co5 C2 94.9(4) . . ?
C16 Co5 C2 107.2(4) . . ?
C14 Co5 C2 141.7(4) . . ?
C15 Co5 Co3 145.5(3) . . ?
C16 Co5 Co3 88.2(3) . . ?
C14 Co5 Co3 106.1(3) . . ?
C2 Co5 Co3 50.9(3) . . ?
C15 Co5 Co4 101.6(4) . . ?
C16 Co5 Co4 148.9(3) . . ?
C14 Co5 Co4 94.3(3) . . ?
C2 Co5 Co4 49.1(3) . . ?
Co3 Co5 Co4 61.46(5) . . ?
C19 Fe C18 90.4(5) . . ?
C19 Fe C17 101.0(4) . . ?
C18 Fe C17 97.7(5) . . ?
C19 Fe C1 110.4(4) . . ?
C18 Fe C1 88.4(5) . . ?
C17 Fe C1 148.0(4) . . ?
C19 Fe C7 86.5(5) . . ?
C18 Fe C7 176.7(4) . . ?
C17 Fe C7 83.8(5) . . ?
C1 Fe C7 91.9(4) . . ?
C19 Fe Co2 110.0(3) . . ?
C18 Fe Co2 136.8(4) . . ?
C17 Fe Co2 114.2(3) . . ?
C1 Fe Co2 49.2(3) . . ?
C7 Fe Co2 44.1(3) . . ?
C19 Fe Co1 158.5(3) . . ?
C18 Fe Co1 87.9(4) . . ?
C17 Fe Co1 100.5(3) . . ?
C1 Fe Co1 48.2(2) . . ?
C7 Fe Co1 94.7(3) . . ?
Co2 Fe Co1 59.23(5) . . ?
C32 P C26 110.5(4) . . ?
C32 P C20 109.6(4) . . ?
C26 P C20 109.0(4) . . ?
C32 P C38 107.6(4) . . ?
C26 P C38 109.6(5) . . ?
C20 P C38 110.5(4) . . ?
C2 C1 Co1 137.2(6) . . ?
C2 C1 Fe 139.4(6) . . ?
Co1 C1 Fe 83.2(3) . . ?
C2 C1 Co2 103.9(7) . . ?
Co1 C1 Co2 81.4(3) . . ?
Fe C1 Co2 82.1(4) . . ?
C1 C2 Co4 143.0(7) . . ?
C1 C2 Co5 133.7(6) . . ?
Co4 C2 Co5 80.4(3) . . ?
C1 C2 Co3 114.0(7) . . ?
Co4 C2 Co3 82.0(3) . . ?
Co5 C2 Co3 79.0(3) . . ?
O3 C3 Co1 176.5(12) . . ?
O4 C4 Co1 176.6(9) . . ?
O5 C5 Co1 176.8(15) . . ?
O6 C6 Co2 176.1(10) . . ?
O7 C7 Co2 148.1(14) . . ?
O7 C7 Fe 132.5(11) . . ?
Co2 C7 Fe 79.4(6) . . ?
O8 C8 Co2 142.6(11) . . ?
O8 C8 Co3 129.6(9) . . ?
Co2 C8 Co3 87.8(7) . . ?
O9 C9 Co3 173.9(9) . . ?
O10 C10 Co3 177.7(10) . . ?
O11 C11 Co4 177.3(10) . . ?
O12 C12 Co4 176.4(12) . . ?
O13 C13 Co4 177.0(10) . . ?
O14 C14 Co5 178.3(11) . . ?
O15 C15 Co5 174.7(8) . . ?
O16 C16 Co5 176.4(13) . . ?
O17 C17 Fe 177.6(11) . . ?
O18 C18 Fe 177.0(12) . . ?
O19 C19 Fe 175.7(10) . . ?
C21 C20 C25 119.5(8) . . ?
C21 C20 P 120.9(6) . . ?
C25 C20 P 119.5(7) . . ?
C22 C21 C20 120.3(9) . . ?
C22 C21 H21 119.9 . . ?
C20 C21 H21 119.9 . . ?
C21 C22 C23 120.6(11) . . ?
C21 C22 H22 119.7 . . ?
C23 C22 H22 119.7 . . ?
C24 C23 C22 119.5(12) . . ?
C24 C23 H23 120.3 . . ?
C22 C23 H23 120.3 . . ?
C23 C24 C25 122.6(11) . . ?
C23 C24 H24 118.7 . . ?
C25 C24 H24 118.7 . . ?
C24 C25 C20 117.3(10) . . ?
C24 C25 H25 121.4 . . ?
C20 C25 H25 121.4 . . ?
C31 C26 C27 119.6(11) . . ?
C31 C26 P 121.1(10) . . ?
C27 C26 P 119.2(9) . . ?
C28 C27 C26 120.1(11) . . ?
C28 C27 H27 120.0 . . ?
C26 C27 H27 120.0 . . ?
C27 C28 C29 121.1(13) . . ?
C27 C28 H28 119.4 . . ?
C29 C28 H28 119.4 . . ?
C30 C29 C28 119.0(14) . . ?
C30 C29 H29 120.5 . . ?
C28 C29 H29 120.5 . . ?
C29 C30 C31 120.7(13) . . ?
C29 C30 H30 119.7 . . ?
C31 C30 H30 119.7 . . ?
C26 C31 C30 119.5(11) . . ?
C26 C31 H31 120.3 . . ?
C30 C31 H31 120.3 . . ?
C33 C32 C37 116.4(8) . . ?
C33 C32 P 121.5(6) . . ?
C37 C32 P 122.1(8) . . ?
C34 C33 C32 120.4(8) . . ?
C34 C33 H33 119.8 . . ?
C32 C33 H33 119.8 . . ?
C33 C34 C35 121.3(10) . . ?
C33 C34 H34 119.4 . . ?
C35 C34 H34 119.4 . . ?
C36 C35 C34 120.4(10) . . ?
C36 C35 H35 119.8 . . ?
C34 C35 H35 119.8 . . ?
C37 C36 C35 118.1(9) . . ?
C37 C36 H36 120.9 . . ?
C35 C36 H36 120.9 . . ?
C36 C37 C32 123.4(10) . . ?
C36 C37 H37 118.3 . . ?
C32 C37 H37 118.3 . . ?
C39 C38 C43 121.1(9) . . ?
C39 C38 P 121.9(9) . . ?
C43 C38 P 117.0(10) . . ?
C38 C39 C40 120.7(12) . . ?
C38 C39 H39 119.6 . . ?
C40 C39 H39 119.6 . . ?
C41 C40 C39 118.7(12) . . ?
C41 C40 H40 120.6 . . ?
C39 C40 H40 120.6 . . ?
C40 C41 C42 121.9(10) . . ?
C40 C41 H41 119.0 . . ?
C42 C41 H41 119.0 . . ?
C41 C42 C43 118.6(11) . . ?
C41 C42 H42 120.7 . . ?
C43 C42 H42 120.7 . . ?
C38 C43 C42 118.8(11) . . ?
C38 C43 H43 120.6 . . ?
C42 C43 H43 120.6 . . ?

_diffrn_measured_fraction_theta_max    0.390
_diffrn_reflns_theta_full              28.89
_refine_diff_density_max    0.435
_refine_diff_density_min   -0.408
_refine_diff_density_rms    0.081

#===END

data_for 4

_audit_creation_method            SHELXL-97
_chemical_name_systematic
;
 ?
;
_chemical_name_common             ?
_chemical_formula_moiety          ?
_chemical_formula_sum
 'C71 H60 Au3 Fe3 O12 P3'
_chemical_formula_weight          1956.55

loop_
 _atom_type_symbol
 _atom_type_description
 _atom_type_scat_dispersion_real
 _atom_type_scat_dispersion_imag
 _atom_type_scat_source
 'C'  'C'   0.0033   0.0016
 'International Tables Vol C Tables 4.2.6.8 and 6.1.1.4'
 'H'  'H'   0.0000   0.0000
 'International Tables Vol C Tables 4.2.6.8 and 6.1.1.4'
 'O'  'O'   0.0106   0.0060
 'International Tables Vol C Tables 4.2.6.8 and 6.1.1.4'
 'Fe'  'Fe'   0.3463   0.8444
 'International Tables Vol C Tables 4.2.6.8 and 6.1.1.4'
 'Au'  'Au'  -2.0133   8.8022
 'International Tables Vol C Tables 4.2.6.8 and 6.1.1.4'
 'P'  'P'   0.1023   0.0942
 'International Tables Vol C Tables 4.2.6.8 and 6.1.1.4'

_symmetry_cell_setting            ?
_symmetry_space_group_name_H-M    ?

loop_
 _symmetry_equiv_pos_as_xyz
 'x, y, z'
 '-x, y+1/2, -z+1/2'
 '-x, -y, -z'
 'x, -y-1/2, z-1/2'

_cell_length_a                    13.8260(10)
_cell_length_b                    22.9620(10)
_cell_length_c                    21.9070(10)
_cell_angle_alpha                 90.00
_cell_angle_beta                  97.1990(10)
_cell_angle_gamma                 90.00
_cell_volume                      6900.0(7)
_cell_formula_units_Z             4
_cell_measurement_temperature     293(2)
_cell_measurement_reflns_used     ?
_cell_measurement_theta_min       ?
_cell_measurement_theta_max       ?

_exptl_crystal_description        ?
_exptl_crystal_colour             ?
_exptl_crystal_size_max           ?
_exptl_crystal_size_mid           ?
_exptl_crystal_size_min           ?
_exptl_crystal_density_meas       ?
_exptl_crystal_density_diffrn     1.883
_exptl_crystal_density_method     'not measured'
_exptl_crystal_F_000              3768
_exptl_absorpt_coefficient_mu     7.098
_exptl_absorpt_correction_type    ?
_exptl_absorpt_correction_T_min   ?
_exptl_absorpt_correction_T_max   ?

_exptl_special_details
;
 ?
;

_diffrn_ambient_temperature       293(2)
_diffrn_radiation_wavelength      0.71069
_diffrn_radiation_type            MoK\a
_diffrn_radiation_source          'fine-focus sealed tube'
_diffrn_radiation_monochromator   graphite
_diffrn_measurement_device_type   ?
_diffrn_measurement_method        ?
_diffrn_detector_area_resol_mean  ?
_diffrn_standards_number          ?
_diffrn_standards_interval_count  ?
_diffrn_standards_interval_time   ?
_diffrn_standards_decay_%         ?
_diffrn_reflns_number             19000
_diffrn_reflns_av_R_equivalents   0.0407
_diffrn_reflns_av_sigmaI/netI     0.0304
_diffrn_reflns_limit_h_min        -19
_diffrn_reflns_limit_h_max        15
_diffrn_reflns_limit_k_min        0
_diffrn_reflns_limit_k_max        30
_diffrn_reflns_limit_l_min        0
_diffrn_reflns_limit_l_max        30
_diffrn_reflns_theta_min          2.53
_diffrn_reflns_theta_max          31.63
_reflns_number_total              9411
_reflns_number_gt                 6533
_reflns_threshold_expression      >2sigma(I)

_computing_data_collection        ?
_computing_cell_refinement        ?
_computing_data_reduction         ?
_computing_structure_solution     'SHELXS-97 (Sheldrick, 1990)'
_computing_structure_refinement   'SHELXL-97 (Sheldrick, 1997)'
_computing_molecular_graphics     ?
_computing_publication_material   ?

_refine_special_details
;
 Refinement of F^2^ against ALL reflections.  The weighted R-factor wR and
 goodness of fit S are based on F^2^, conventional R-factors R are based
 on F, with F set to zero for negative F^2^. The threshold expression of
 F^2^ > 2sigma(F^2^) is used only for calculating R-factors(gt) etc. and is
 not relevant to the choice of reflections for refinement.  R-factors based
 on F^2^ are statistically about twice as large as those based on F, and R-
 factors based on ALL data will be even larger.
;

_refine_ls_structure_factor_coef  Fsqd
_refine_ls_matrix_type            full
_refine_ls_weighting_scheme
 'calc w=1/[\s^2^(Fo^2^)+(0.0499P)^2^+19.1510P] where P=(Fo^2^+2Fc^2^)/3'
_atom_sites_solution_primary      direct
_atom_sites_solution_secondary    difmap
_atom_sites_solution_hydrogens    geom
_refine_ls_hydrogen_treatment     mixed
_refine_ls_extinction_method      none
_refine_ls_extinction_coef        ?
_refine_ls_extinction_expression
'Fc'
_refine_ls_number_reflns          9411
_refine_ls_number_parameters      782
_refine_ls_number_restraints      235
_refine_ls_R_factor_all           0.0666
_refine_ls_R_factor_gt            0.0373
_refine_ls_wR_factor_ref          0.1030
_refine_ls_wR_factor_gt           0.0951
_refine_ls_goodness_of_fit_ref    1.064
_refine_ls_restrained_S_all       1.052
_refine_ls_shift/su_max           0.001
_refine_ls_shift/su_mean          0.000

loop_
 _atom_site_label
 _atom_site_type_symbol
 _atom_site_fract_x
 _atom_site_fract_y
 _atom_site_fract_z
 _atom_site_U_iso_or_equiv
 _atom_site_adp_type
 _atom_site_occupancy
 _atom_site_calc_flag
 _atom_site_refinement_flags
 _atom_site_disorder_assembly
 _atom_site_disorder_group
Au1 Au 0.01191(2) 0.142318(14) 0.182147(18) 0.04942(12) Uani 1 d . . .
Au2 Au 0.16003(2) 0.131052(13) 0.288589(18) 0.04533(12) Uani 1 d . . .
Au3 Au 0.21861(2) 0.010484(13) 0.294284(17) 0.04645(12) Uani 1 d . . .
Fe1 Fe -0.03186(8) 0.13135(4) 0.29912(6) 0.0405(3) Uani 1 d . . .
Fe2 Fe 0.08595(7) 0.05290(4) 0.36294(6) 0.0386(3) Uani 1 d . . .
Fe3 Fe 0.03237(8) 0.03744(4) 0.24041(6) 0.0380(3) Uani 1 d . . .
P1 P 0.35369(15) -0.04265(9) 0.28010(12) 0.0484(6) Uani 1 d . . .
P2 P 0.28989(15) 0.19257(9) 0.28531(12) 0.0500(6) Uani 1 d . . .
P3 P -0.01773(16) 0.19480(9) 0.09294(12) 0.0486(6) Uani 1 d . . .
O1 O -0.1684(5) -0.0183(3) 0.2915(4) 0.087(3) Uani 1 d . . .
O2 O -0.1547(4) 0.0327(3) 0.3778(3) 0.0678(19) Uani 1 d . . .
O5 O -0.2316(5) 0.1366(3) 0.2404(5) 0.092(3) Uani 1 d . . .
O6 O 0.1628(4) 0.0340(3) 0.1431(3) 0.075(2) Uani 1 d . . .
O7 O 0.1051(6) -0.0701(3) 0.3975(4) 0.087(2) Uani 1 d . . .
O8 O 0.0208(5) -0.0888(3) 0.2535(3) 0.076(2) Uani 1 d . . .
O9 O 0.0059(5) 0.0704(3) 0.4775(4) 0.086(2) Uani 1 d . . .
O10 O -0.0994(8) 0.1727(4) 0.4111(5) 0.135(4) Uani 1 d . . .
O11 O 0.2723(5) 0.0965(3) 0.4278(3) 0.0646(19) Uani 1 d . . .
O12 O 0.0128(5) 0.2550(2) 0.2793(4) 0.080(2) Uani 1 d . . .
O13 O -0.1441(5) 0.0300(3) 0.1543(4) 0.075(2) Uani 1 d . . .
C1 C -0.0367(6) 0.0478(3) 0.3117(4) 0.0425(11) Uani 1 d . . .
C2 C -0.1264(6) 0.0171(3) 0.3241(4) 0.043(2) Uani 1 d . . .
C3 C -0.2409(7) 0.0073(5) 0.3930(6) 0.080(3) Uani 1 d . . .
H3 H -0.2414 -0.0341 0.3842 0.096 Uiso 1 calc R . .
H3A H -0.2972 0.0250 0.3692 0.096 Uiso 1 calc R . .
C4 C -0.2444(8) 0.0171(6) 0.4599(6) 0.105(5) Uani 1 d . . .
H4 H -0.3029 0.0003 0.4716 0.126 Uiso 1 calc R . .
H4A H -0.2438 0.0582 0.4681 0.126 Uiso 1 calc R . .
H4B H -0.1887 -0.0007 0.4831 0.126 Uiso 1 calc R . .
C5 C -0.1527(6) 0.1347(3) 0.2593(5) 0.050(3) Uani 1 d . . .
C6 C 0.1177(6) 0.0388(3) 0.1807(4) 0.0425(11) Uani 1 d . . .
C7 C 0.1016(6) -0.0215(4) 0.3799(4) 0.051(2) Uani 1 d . . .
C8 C 0.0311(6) -0.0394(3) 0.2493(4) 0.0425(11) Uani 1 d . . .
C9 C 0.0356(6) 0.0663(4) 0.4322(5) 0.056(3) Uani 1 d . . .
C10 C -0.0680(7) 0.1541(4) 0.3701(6) 0.065(3) Uani 1 d . . .
C11 C 0.2037(6) 0.0811(4) 0.3981(5) 0.048(2) Uani 1 d . . .
C12 C 0.0042(7) 0.2052(4) 0.2860(5) 0.065(3) Uani 1 d . . .
C13 C -0.0768(7) 0.0351(3) 0.1875(5) 0.0425(11) Uani 1 d . . .
C111 C 0.4238(7) -0.0677(4) 0.3486(6) 0.0732(14) Uani 1 d U . .
C112 C 0.4957(7) -0.1128(4) 0.3493(6) 0.0735(14) Uani 1 d U . .
H112 H 0.5054 -0.1314 0.3128 0.088 Uiso 1 calc R . .
C113 C 0.5500(7) -0.1285(4) 0.4033(6) 0.0740(15) Uani 1 d U . .
H113 H 0.5977 -0.1570 0.4026 0.089 Uiso 1 calc R . .
C114 C 0.5369(7) -0.1053(4) 0.4547(6) 0.0744(15) Uani 1 d U . .
H114 H 0.5749 -0.1169 0.4907 0.089 Uiso 1 calc R . .
C115 C 0.4676(7) -0.0635(4) 0.4568(6) 0.0743(14) Uani 1 d U . .
H115 H 0.4566 -0.0486 0.4947 0.089 Uiso 1 calc R . .
C116 C 0.4153(7) -0.0435(4) 0.4063(6) 0.0737(14) Uani 1 d U . .
H116 H 0.3721 -0.0129 0.4093 0.088 Uiso 1 calc R . .
C121 C 0.4414(7) -0.0071(4) 0.2384(6) 0.0722(15) Uani 1 d U . .
C122 C0.5393(7) -0.0094(4) 0.2533(6) 0.0724(15) Uani 1 d U . .
H122 H 0.5648 -0.0325 0.2864 0.087 Uiso 1 calc R . .
C123 C 0.6026(7) 0.0210(5) 0.2215(6) 0.0725(15) Uani 1 d U . .
H123 H 0.6695 0.0208 0.2338 0.087 Uiso 1 calc R . .
C124 C 0.2063(8) 0.3747(5) 0.3403(9) 0.118(6) Uani 1 d . . .
H124 H 0.1841 0.4112 0.3505 0.141 Uiso 1 calc R . .
C125 C 0.4632(7) 0.0575(4) 0.1534(6) 0.0731(15) Uani 1 d U . .
H125 H 0.4382 0.0795 0.1193 0.088 Uiso 1 calc R . .
C126 C 0.4037(7) 0.0288(4) 0.1896(5) 0.0726(15) Uani 1 d U . .
H126 H 0.3365 0.0335 0.1813 0.087 Uiso 1 calc R . .
C131 C 0.3226(8) -0.1096(5) 0.2406(7) 0.0956(17) Uani 1 d U . .
C132 C 0.2579(8) -0.1468(5) 0.2618(7) 0.0958(17) Uani 1 d U . .
H132 H 0.2251 -0.1340 0.2939 0.115 Uiso 1 calc R . .
C133 C 0.2380(8) -0.2008(5) 0.2399(7) 0.0965(17) Uani 1 d U . .
H133 H 0.1965 -0.2253 0.2583 0.116 Uiso 1 calc R . .
C134 C 0.2794(8) -0.2184(5) 0.1911(7) 0.0970(17) Uani 1 d U . .
H134 H 0.2661 -0.2555 0.1750 0.116 Uiso 1 calc R . .
C135 C 0.3418(8) -0.1822(5) 0.1645(7) 0.0969(17) Uani 1 d U . .
H135 H 0.3680 -0.1935 0.1292 0.116 Uiso 1 calc R . .
C136 C 0.3646(8) -0.1284(5) 0.1917(7) 0.0963(17) Uani 1 d U . .
H136 H 0.4100 -0.1047 0.1759 0.116 Uiso 1 calc R . .
C211 C 0.4012(8) 0.1767(5) 0.3374(7) 0.0969(18) Uani 1 d U . .
C212 C 0.4402(8) 0.1229(5) 0.3350(7) 0.0977(18) Uani 1 d U . .
H212 H 0.4081 0.0944 0.3100 0.117 Uiso 1 calc R . .
C213 C 0.5277(8) 0.1105(5) 0.3700(7) 0.0984(18) Uani 1 d U . .
H213 H 0.5546 0.0735 0.3690 0.118 Uiso 1 calc R . .
C214 C 0.5730(9) 0.1512(5) 0.4046(7) 0.0984(18) Uani 1 d U . .
H214 H 0.6373 0.1448 0.4214 0.118 Uiso 1 calc R . .
C215 C 0.5308(8) 0.2006(5) 0.4165(7) 0.0980(18) Uani 1 d U . .
H215 H 0.5569 0.2243 0.4489 0.118 Uiso 1 calc R . .
C216 C 0.4440(8) 0.2166(5) 0.3782(7) 0.0973(18) Uani 1 d U . .
H216 H 0.4171 0.2534 0.3811 0.117 Uiso 1 calc R . .
C221 C 0.2576(9) 0.2673(4) 0.3048(6) 0.0879(17) Uani 1 d U . .
C222 C 0.2784(8) 0.3149(4) 0.2728(6) 0.0884(17) Uani 1 d U . .
H222 H 0.3108 0.3109 0.2383 0.106 Uiso 1 calc R . .
C223 C 0.2517(9) 0.3700(4) 0.2911(7) 0.0892(17) Uani 1 d U . .
H223 H 0.2657 0.4029 0.2691 0.107 Uiso 1 calc R . .
C224 C 0.5628(9) 0.0517(5) 0.1709(6) 0.100(4) Uani 1 d . . .
H224 H 0.6049 0.0697 0.1468 0.120 Uiso 1 calc R . .
C225 C 0.1898(8) 0.3274(4) 0.3777(6) 0.0886(17) Uani 1 d U . .
H225 H 0.1647 0.3322 0.4149 0.106 Uiso 1 calc R . .
C226 C 0.2122(8) 0.2741(4) 0.3571(6) 0.0882(17) Uani 1 d U . .
H226 H 0.1967 0.2412 0.3787 0.106 Uiso 1 calc R . .
C231 C 0.3416(8) 0.1996(4) 0.2158(6) 0.072(3) Uani 1 d . . .
C232 C 0.4316(7) 0.2215(5) 0.2104(6) 0.092(4) Uani 1 d . . .
H232 H 0.4710 0.2340 0.2455 0.110 Uiso 1 calc R . .
C233 C 0.4659(10) 0.2255(7) 0.1536(9) 0.130(7) Uani 1 d . . .
H233 H 0.5298 0.2372 0.1514 0.155 Uiso 1 calc R . .
C234 C 0.4073(10) 0.2125(6) 0.1016(7) 0.100(5) Uani 1 d . . .
H234 H 0.4279 0.2193 0.0634 0.120 Uiso 1 calc R . .
C235 C 0.3152(10) 0.1889(5) 0.1054(6) 0.091(4) Uani 1 d . . .
H235 H 0.2753 0.1765 0.0705 0.110 Uiso 1 calc R . .
C236 C 0.2861(8) 0.1846(4) 0.1629(6) 0.073(3) Uani 1 d . . .
H236 H 0.2237 0.1705 0.1656 0.087 Uiso 1 calc R . .
C311 C -0.1392(7) 0.2273(4) 0.0848(6) 0.0784(14) Uani 1 d U . .
C312 C -0.1537(7) 0.2853(4) 0.0701(6) 0.0788(14) Uani 1 d U . .
H312 H -0.1012 0.3088 0.0634 0.095 Uiso 1 calc R . .
C313 C -0.2457(7) 0.3080(5) 0.0653(6) 0.0793(14) Uani 1 d U . .
H313 H -0.2552 0.3473 0.0563 0.095 Uiso 1 calc R . .
C314 C -0.3224(7) 0.2745(4) 0.0735(6) 0.0795(14) Uani 1 d U . .
H314 H -0.3845 0.2907 0.0709 0.095 Uiso 1 calc R . .
C315 C -0.3092(7) 0.2167(4) 0.0858(6) 0.0795(14) Uani 1 d U . .
H315 H -0.3623 0.1919 0.0861 0.095 Uiso 1 calc R . .
C316 C -0.2147(7) 0.1958(5) 0.0979(6) 0.0787(14) Uani 1 d U . .
H316 H -0.2039 0.1591 0.1154 0.094 Uiso 1 calc R . .
C321 C 0.0619(7) 0.2538(4) 0.0832(5) 0.059(3) Uani 1 d . . .
C322 C 0.0875(8) 0.2927(4) 0.1278(6) 0.080(3) Uani 1 d . . .
H322 H 0.0662 0.2869 0.1660 0.095 Uiso 1 calc R . .
C323 C 0.1440(10) 0.3410(5) 0.1200(7) 0.100(4) Uani 1 d . . .
H323 H 0.1551 0.3689 0.1510 0.120 Uiso 1 calc R . .
C324 C 0.1840(9) 0.3475(6) 0.0653(9) 0.103(5) Uani 1 d . . .
H324 H 0.2236 0.3793 0.0597 0.124 Uiso 1 calc R . .
C325 C 0.1661(10) 0.3093(6) 0.0221(7) 0.102(4) Uani 1 d . . .
H325 H 0.1964 0.3126 -0.0133 0.123 Uiso 1 calc R . .
C326 C 0.1027(8) 0.2635(5) 0.0275(6) 0.085(4) Uani 1 d . . .
H326 H 0.0865 0.2387 -0.0057 0.102 Uiso 1 calc R . .
C331 C -0.0230(9) 0.1521(5) 0.0235(6) 0.0825(15) Uani 1 d U . .
C332 C 0.0314(9) 0.1048(5) 0.0231(6) 0.0828(15) Uani 1 d U . .
H332 H 0.0696 0.0932 0.0590 0.099 Uiso 1 calc R . .
C333 C 0.0321(9) 0.0717(5) -0.0308(6) 0.0833(15) Uani 1 d U . .
H333 H 0.0718 0.0391 -0.0311 0.100 Uiso 1 calc R . .
C334 C -0.0255(9) 0.0880(5) -0.0818(6) 0.0835(15) Uani 1 d U . .
H334 H -0.0314 0.0650 -0.1170 0.100 Uiso 1 calc R . .
C335 C -0.0730(9) 0.1372(5) -0.0809(6) 0.0837(15) Uani 1 d U . .
H335 H -0.1056 0.1507 -0.1179 0.100 Uiso 1 calc R . .
C336 C -0.0782(9) 0.1699(5) -0.0298(5) 0.0831(15) Uani 1 d U . .
H336 H -0.1174 0.2028 -0.0308 0.100 Uiso 1 calc R . .
C14 C 0.4218(18) 0.0972(13) -0.0471(19) 0.346(8) Uiso 1 d D . .
C15 C 0.524(2) 0.1206(9) -0.0368(19) 0.346(8) Uiso 1 d D . .
C16 C 0.6849(18) 0.0820(10) -0.0098(19) 0.346(8) Uiso 1 d D . .
C17 C 0.7353(19) 0.0235(13) -0.0080(19) 0.346(8) Uiso 1 d D . .
O14 O 0.5848(16) 0.0690(8) -0.0324(12) 0.346(8) Uiso 1 d D . .


_geom_special_details
;
 All esds (except the esd in the dihedral angle between two l.s. planes)
 are estimated using the full covariance matrix.  The cell esds are taken
 into account individually in the estimation of esds in distances, angles
 and torsion angles; correlations between esds in cell parameters are only
 used when they are defined by crystal symmetry.  An approximate (isotropic)
 treatment of cell esds is used for estimating esds involving l.s. planes.
;

loop_
 _geom_bond_atom_site_label_1
 _geom_bond_atom_site_label_2
 _geom_bond_distance
 _geom_bond_site_symmetry_2
 _geom_bond_publ_flag
Au1 P3 2.289(2) . ?
Au1 C12 2.708(10) . ?
Au1 Fe1 2.7174(12) . ?
Au1 Fe3 2.7236(11) . ?
Au1 Au2 2.9157(6) . ?
Au2 P2 2.293(2) . ?
Au2 C11 2.659(10) . ?
Au2 Fe1 2.6916(10) . ?
Au2 Fe2 2.7093(10) . ?
Au2 Au3 2.8829(4) . ?
Au2 Fe3 2.8953(11) . ?
Au3 P1 2.2844(19) . ?
Au3 Fe2 2.6956(10) . ?
Au3 Fe3 2.7650(12) . ?
Fe1 C10 1.771(12) . ?
Fe1 C5 1.786(10) . ?
Fe1 C12 1.800(9) . ?
Fe1 C1 1.940(7) . ?
Fe1 Fe2 2.6985(16) . ?
Fe1 Fe3 2.7164(14) . ?
Fe2 C7 1.756(9) . ?
Fe2 C9 1.773(9) . ?
Fe2 C11 1.829(10) . ?
Fe2 C1 1.916(9) . ?
Fe2 Fe3 2.7169(18) . ?
Fe3 C8 1.776(8) . ?
Fe3 C13 1.785(11) . ?
Fe3 C6 1.869(8) . ?
Fe3 C1 1.945(8) . ?
P1 C111 1.777(12) . ?
P1 C131 1.790(11) . ?
P1 C121 1.803(9) . ?
P2 C231 1.769(10) . ?
P2 C211 1.833(13) . ?
P2 C221 1.836(10) . ?
P3 C321 1.775(9) . ?
P3 C331 1.804(12) . ?
P3 C311 1.826(10) . ?
O1 C2 1.184(10) . ?
O2 C2 1.334(9) . ?
O2 C3 1.404(9) . ?
O5 C5 1.119(10) . ?
O6 C6 1.098(9) . ?
O7 C7 1.179(10) . ?
O8 C8 1.148(9) . ?
O9 C9 1.124(10) . ?
O10 C10 1.130(12) . ?
O11 C11 1.138(10) . ?
O12 C12 1.162(9) . ?
O13 C13 1.113(10) . ?
C1 C2 1.482(10) . ?
C3 C4 1.489(16) . ?
C3 H3 0.9700 . ?
C3 H3A 0.9700 . ?
C4 H4 0.9600 . ?
C4 H4A 0.9600 . ?
C4 H4B 0.9600 . ?
C111 C116 1.399(15) . ?
C111 C112 1.433(12) . ?
C112 C113 1.368(15) . ?
C112 H112 0.9300 . ?
C113 C114 1.279(15) . ?
C113 H113 0.9300 . ?
C114 C115 1.361(13) . ?
C114 H114 0.9300 . ?
C115 C116 1.325(14) . ?
C115 H115 0.9300 . ?
C116 H116 0.9300 . ?
C121 C122 1.353(13) . ?
C121 C126 1.398(15) . ?
C122 C123 1.377(12) . ?
C122 H122 0.9300 . ?
C123 C224 1.369(16) . ?
C123 H123 0.9300 . ?
C124 C223 1.317(19) . ?
C124 C225 1.399(18) . ?
C124 H124 0.9300 . ?
C125 C126 1.381(12) . ?
C125 C224 1.388(15) . ?
C125 H125 0.9300 . ?
C126 H126 0.9300 . ?
C131 C136 1.350(17) . ?
C131 C132 1.361(15) . ?
C132 C133 1.345(14) . ?
C132 H132 0.9300 . ?
C133 C134 1.337(15) . ?
C133 H133 0.9300 . ?
C134 C135 1.379(15) . ?
C134 H134 0.9300 . ?
C135 C136 1.392(14) . ?
C135 H135 0.9300 . ?
C136 H136 0.9300 . ?
C211 C212 1.351(15) . ?
C211 C216 1.363(17) . ?
C212 C213 1.378(16) . ?
C212 H212 0.9300 . ?
C213 C214 1.311(17) . ?
C213 H213 0.9300 . ?
C214 C215 1.318(15) . ?
C214 H214 0.9300 . ?
C215 C216 1.423(16) . ?
C215 H215 0.9300 . ?
C216 H216 0.9300 . ?
C221 C222 1.348(14) . ?
C221 C226 1.384(15) . ?
C222 C223 1.392(14) . ?
C222 H222 0.9300 . ?
C223 H223 0.9300 . ?
C224 H224 0.9300 . ?
C225 C226 1.354(14) . ?
C225 H225 0.9300 . ?
C226 H226 0.9300 . ?
C231 C236 1.352(15) . ?
C231 C232 1.361(12) . ?
C232 C233 1.390(18) . ?
C232 H232 0.9300 . ?
C233 C234 1.346(19) . ?
C233 H233 0.9300 . ?
C234 C235 1.396(16) . ?
C234 H234 0.9300 . ?
C235 C236 1.373(14) . ?
C235 H235 0.9300 . ?
C236 H236 0.9300 . ?
C311 C316 1.330(13) . ?
C311 C312 1.379(13) . ?
C312 C313 1.366(12) . ?
C312 H312 0.9300 . ?
C313 C314 1.341(13) . ?
C313 H313 0.9300 . ?
C314 C315 1.361(13) . ?
C314 H314 0.9300 . ?
C315 C316 1.387(13) . ?
C315 H315 0.9300 . ?
C316 H316 0.9300 . ?
C321 C322 1.340(14) . ?
C321 C326 1.425(14) . ?
C322 C323 1.379(14) . ?
C322 H322 0.9300 . ?
C323 C324 1.391(18) . ?
C323 H323 0.9300 . ?
C324 C325 1.291(18) . ?
C324 H324 0.9300 . ?
C325 C326 1.383(14) . ?
C325 H325 0.9300 . ?
C326 H326 0.9300 . ?
C331 C332 1.322(15) . ?
C331 C336 1.375(16) . ?
C332 C333 1.405(15) . ?
C332 H332 0.9300 . ?
C333 C334 1.342(15) . ?
C333 H333 0.9300 . ?
C334 C335 1.307(14) . ?
C334 H334 0.9300 . ?
C335 C336 1.356(14) . ?
C335 H335 0.9300 . ?
C336 H336 0.9300 . ?
C14 C15 1.507(10) . ?
C15 O14 1.445(10) . ?
C16 O14 1.442(10) . ?
C16 C17 1.510(10) . ?

loop_
 _geom_angle_atom_site_label_1
 _geom_angle_atom_site_label_2
 _geom_angle_atom_site_label_3
 _geom_angle
 _geom_angle_site_symmetry_1
 _geom_angle_site_symmetry_3
 _geom_angle_publ_flag
P3 Au1 C12 114.5(2) . . ?
P3 Au1 Fe1 144.76(6) . . ?
C12 Au1 Fe1 38.76(19) . . ?
P3 Au1 Fe3 149.62(6) . . ?
C12 Au1 Fe3 95.18(19) . . ?
Fe1 Au1 Fe3 59.90(3) . . ?
P3 Au1 Au2 139.66(6) . . ?
C12 Au1 Au2 58.2(2) . . ?
Fe1 Au1 Au2 56.96(3) . . ?
Fe3 Au1 Au2 61.67(3) . . ?
P2 Au2 C11 101.8(2) . . ?
P2 Au2 Fe1 141.75(6) . . ?
C11 Au2 Fe1 92.20(17) . . ?
P2 Au2 Fe2 141.58(7) . . ?
C11 Au2 Fe2 39.8(2) . . ?
Fe1 Au2 Fe2 59.95(3) . . ?
P2 Au2 Au3 112.09(5) . . ?
C11 Au2 Au3 61.06(18) . . ?
Fe1 Au2 Au3 105.86(2) . . ?
Fe2 Au2 Au3 57.54(2) . . ?
P2 Au2 Fe3 152.87(7) . . ?
C11 Au2 Fe3 93.9(2) . . ?
Fe1 Au2 Fe3 58.04(3) . . ?
Fe2 Au2 Fe3 57.88(3) . . ?
Au3 Au2 Fe3 57.18(2) . . ?
P2 Au2 Au1 113.24(7) . . ?
C11 Au2 Au1 144.8(2) . . ?
Fe1 Au2 Au1 57.81(3) . . ?
Fe2 Au2 Au1 105.01(3) . . ?
Au3 Au2 Au1 106.569(15) . . ?
Fe3 Au2 Au1 55.90(3) . . ?
P1 Au3 Fe2 153.37(7) . . ?
P1 Au3 Fe3 142.66(7) . . ?
Fe2 Au3 Fe3 59.66(4) . . ?
P1 Au3 Au2 137.48(5) . . ?
Fe2 Au3 Au2 58.00(2) . . ?
Fe3 Au3 Au2 61.64(2) . . ?
C10 Fe1 C5 93.8(4) . . ?
C10 Fe1 C12 88.7(4) . . ?
C5 Fe1 C12 98.2(4) . . ?
C10 Fe1 C1 98.5(4) . . ?
C5 Fe1 C1 93.7(4) . . ?
C12 Fe1 C1 165.6(3) . . ?
C10 Fe1 Au2 117.8(3) . . ?
C5 Fe1 Au2 146.1(3) . . ?
C12 Fe1 Au2 72.1(3) . . ?
C1 Fe1 Au2 93.5(2) . . ?
C10 Fe1 Fe2 87.7(3) . . ?
C5 Fe1 Fe2 138.4(3) . . ?
C12 Fe1 Fe2 123.4(3) . . ?
C1 Fe1 Fe2 45.2(3) . . ?
Au2 Fe1 Fe2 60.35(3) . . ?
C10 Fe1 Fe3 142.6(3) . . ?
C5 Fe1 Fe3 98.3(3) . . ?
C12 Fe1 Fe3 124.0(3) . . ?
C1 Fe1 Fe3 45.7(2) . . ?
Au2 Fe1 Fe3 64.74(3) . . ?
Fe2 Fe1 Fe3 60.23(4) . . ?
C10 Fe1 Au1 157.2(3) . . ?
C5 Fe1 Au1 80.8(3) . . ?
C12 Fe1 Au1 70.3(3) . . ?
C1 Fe1 Au1 104.0(2) . . ?
Au2 Fe1 Au1 65.24(3) . . ?
Fe2 Fe1 Au1 111.05(4) . . ?
Fe3 Fe1 Au1 60.16(3) . . ?
C7 Fe2 C9 92.3(4) . . ?
C7 Fe2 C11 100.2(4) . . ?
C9 Fe2 C11 90.1(4) . . ?
C7 Fe2 C1 98.1(4) . . ?
C9 Fe2 C1 95.6(4) . . ?
C11 Fe2 C1 160.6(4) . . ?
C7 Fe2 Au3 72.1(3) . . ?
C9 Fe2 Au3 155.1(3) . . ?
C11 Fe2 Au3 74.4(2) . . ?
C1 Fe2 Au3 105.4(2) . . ?
C7 Fe2 Fe1 144.0(3) . . ?
C9 Fe2 Fe1 92.9(3) . . ?
C11 Fe2 Fe1 115.4(3) . . ?
C1 Fe2 Fe1 45.9(2) . . ?
Au3 Fe2 Fe1 111.15(5) . . ?
C7 Fe2 Au2 136.5(3) . . ?
C9 Fe2 Au2 128.1(3) . . ?
C11 Fe2 Au2 68.6(3) . . ?
C1 Fe2 Au2 93.5(2) . . ?
Au3 Fe2 Au2 64.47(2) . . ?
Fe1 Fe2 Au2 59.70(3) . . ?
C7 Fe2 Fe3 95.3(3) . . ?
C9 Fe2 Fe3 141.3(3) . . ?
C11 Fe2 Fe3 125.5(3) . . ?
C1 Fe2 Fe3 45.7(2) . . ?
Au3 Fe2 Fe3 61.44(3) . . ?
Fe1 Fe2 Fe3 60.21(4) . . ?
Au2 Fe2 Fe3 64.50(3) . . ?
C8 Fe3 C13 91.3(4) . . ?
C8 Fe3 C6 96.2(3) . . ?
C13 Fe3 C6 95.9(4) . . ?
C8 Fe3 C1 91.2(3) . . ?
C13 Fe3 C1 93.7(4) . . ?
C6 Fe3 C1 167.7(4) . . ?
C8 Fe3 Fe1 136.8(2) . . ?
C13 Fe3 Fe1 91.8(2) . . ?
C6 Fe3 Fe1 126.2(2) . . ?
C1 Fe3 Fe1 45.6(2) . . ?
C8 Fe3 Fe2 91.6(3) . . ?
C13 Fe3 Fe2 138.5(3) . . ?
C6 Fe3 Fe2 124.9(3) . . ?
C1 Fe3 Fe2 44.8(3) . . ?
Fe1 Fe3 Fe2 59.56(4) . . ?
C8 Fe3 Au1 158.1(3) . . ?
C13 Fe3 Au1 72.1(2) . . ?
C6 Fe3 Au1 72.2(2) . . ?
C1 Fe3 Au1 103.6(2) . . ?
Fe1 Fe3 Au1 59.94(3) . . ?
Fe2 Fe3 Au1 110.30(4) . . ?
C8 Fe3 Au3 75.7(3) . . ?
C13 Fe3 Au3 159.6(2) . . ?
C6 Fe3 Au3 70.5(3) . . ?
C1 Fe3 Au3 102.1(3) . . ?
Fe1 Fe3 Au3 108.53(5) . . ?
Fe2 Fe3 Au3 58.90(3) . . ?
Au1 Fe3 Au3 115.75(4) . . ?
C8 Fe3 Au2 135.4(3) . . ?
C13 Fe3 Au2 133.3(2) . . ?
C6 Fe3 Au2 80.4(2) . . ?
C1 Fe3 Au2 87.4(2) . . ?
Fe1 Fe3 Au2 57.22(3) . . ?
Fe2 Fe3 Au2 57.63(3) . . ?
Au1 Fe3 Au2 62.43(2) . . ?
Au3 Fe3 Au2 61.18(3) . . ?
C111 P1 C131 101.7(6) . . ?
C111 P1 C121 104.1(5) . . ?
C131 P1 C121 106.2(6) . . ?
C111 P1 Au3 115.3(4) . . ?
C131 P1 Au3 111.9(4) . . ?
C121 P1 Au3 116.2(3) . . ?
C231 P2 C211 98.9(6) . . ?
C231 P2 C221 104.5(5) . . ?
C211 P2 C221 104.5(6) . . ?
C231 P2 Au2 119.1(4) . . ?
C211 P2 Au2 117.2(4) . . ?
C221 P2 Au2 110.8(4) . . ?
C321 P3 C331 105.9(5) . . ?
C321 P3 C311 104.7(5) . . ?
C331 P3 C311 101.6(6) . . ?
C321 P3 Au1 117.2(3) . . ?
C331 P3 Au1 114.7(4) . . ?
C311 P3 Au1 111.3(4) . . ?
C2 O2 C3 116.8(8) . . ?
C2 C1 Fe2 128.5(6) . . ?
C2 C1 Fe1 122.8(5) . . ?
Fe2 C1 Fe1 88.8(3) . . ?
C2 C1 Fe3 126.5(6) . . ?
Fe2 C1 Fe3 89.5(3) . . ?
Fe1 C1 Fe3 88.7(3) . . ?
O1 C2 O2 122.6(7) . . ?
O1 C2 C1 125.1(7) . . ?
O2 C2 C1 112.2(7) . . ?
O2 C3 C4 107.7(9) . . ?
O2 C3 H3 110.2 . . ?
C4 C3 H3 110.2 . . ?
O2 C3 H3A 110.2 . . ?
C4 C3 H3A 110.2 . . ?
H3 C3 H3A 108.5 . . ?
C3 C4 H4 109.5 . . ?
C3 C4 H4A 109.5 . . ?
H4 C4 H4A 109.5 . . ?
C3 C4 H4B 109.5 . . ?
H4 C4 H4B 109.5 . . ?
H4A C4 H4B 109.5 . . ?
O5 C5 Fe1 172.6(9) . . ?
O6 C6 Fe3 172.0(8) . . ?
O7 C7 Fe2 171.2(8) . . ?
O8 C8 Fe3 173.5(8) . . ?
O9 C9 Fe2 174.4(8) . . ?
O10 C10 Fe1 171.4(10) . . ?
O11 C11 Fe2 170.0(8) . . ?
O11 C11 Au2 117.5(7) . . ?
Fe2 C11 Au2 71.6(3) . . ?
O12 C12 Fe1 169.3(7) . . ?
O12 C12 Au1 113.8(7) . . ?
Fe1 C12 Au1 70.9(3) . . ?
O13 C13 Fe3 175.5(7) . . ?
C116 C111 C112 114.4(11) . . ?
C116 C111 P1 122.4(8) . . ?
C112 C111 P1 123.1(10) . . ?
C113 C112 C111 120.3(12) . . ?
C113 C112 H112 119.8 . . ?
C111 C112 H112 119.8 . . ?
C114 C113 C112 121.9(10) . . ?
C114 C113 H113 119.1 . . ?
C112 C113 H113 119.1 . . ?
C113 C114 C115 120.1(12) . . ?
C113 C114 H114 120.0 . . ?
C115 C114 H114 120.0 . . ?
C116 C115 C114 122.0(12) . . ?
C116 C115 H115 119.0 . . ?
C114 C115 H115 119.0 . . ?
C115 C116 C111 121.2(10) . . ?
C115 C116 H116 119.4 . . ?
C111 C116 H116 119.4 . . ?
C122 C121 C126 118.3(9) . . ?
C122 C121 P1 125.2(9) . . ?
C126 C121 P1 116.4(7) . . ?
C121 C122 C123 122.5(11) . . ?
C121 C122 H122 118.7 . . ?
C123 C122 H122 118.7 . . ?
C224 C123 C122 117.0(10) . . ?
C224 C123 H123 121.5 . . ?
C122 C123 H123 121.5 . . ?
C223 C124 C225 123.1(11) . . ?
C223 C124 H124 118.5 . . ?
C225 C124 H124 118.5 . . ?
C126 C125 C224 115.9(10) . . ?
C126 C125 H125 122.1 . . ?
C224 C125 H125 122.1 . . ?
C125 C126 C121 122.0(9) . . ?
C125 C126 H126 119.0 . . ?
C121 C126 H126 119.0 . . ?
C136 C131 C132 115.9(11) . . ?
C136 C131 P1 123.8(9) . . ?
C132 C131 P1 120.1(10) . . ?
C133 C132 C131 124.8(12) . . ?
C133 C132 H132 117.6 . . ?
C131 C132 H132 117.6 . . ?
C134 C133 C132 118.4(12) . . ?
C134 C133 H133 120.8 . . ?
C132 C133 H133 120.8 . . ?
C133 C134 C135 120.6(11) . . ?
C133 C134 H134 119.7 . . ?
C135 C134 H134 119.7 . . ?
C134 C135 C136 118.3(12) . . ?
C134 C135 H135 120.8 . . ?
C136 C135 H135 120.8 . . ?
C131 C136 C135 121.8(12) . . ?
C131 C136 H136 119.1 . . ?
C135 C136 H136 119.1 . . ?
C212 C211 C216 119.7(12) . . ?
C212 C211 P2 117.8(10) . . ?
C216 C211 P2 122.5(9) . . ?
C211 C212 C213 119.6(13) . . ?
C211 C212 H212 120.2 . . ?
C213 C212 H212 120.2 . . ?
C214 C213 C212 119.8(12) . . ?
C214 C213 H213 120.1 . . ?
C212 C213 H213 120.1 . . ?
C213 C214 C215 122.4(13) . . ?
C213 C214 H214 118.8 . . ?
C215 C214 H214 118.8 . . ?
C214 C215 C216 117.8(13) . . ?
C214 C215 H215 121.1 . . ?
C216 C215 H215 121.1 . . ?
C211 C216 C215 118.7(11) . . ?
C211 C216 H216 120.7 . . ?
C215 C216 H216 120.7 . . ?
C222 C221 C226 119.2(10) . . ?
C222 C221 P2 124.3(10) . . ?
C226 C221 P2 116.5(8) . . ?
C221 C222 C223 120.4(12) . . ?
C221 C222 H222 119.8 . . ?
C223 C222 H222 119.8 . . ?
C124 C223 C222 118.8(11) . . ?
C124 C223 H223 120.6 . . ?
C222 C223 H223 120.6 . . ?
C123 C224 C125 123.9(10) . . ?
C123 C224 H224 118.0 . . ?
C125 C224 H224 118.0 . . ?
C226 C225 C124 116.5(13) . . ?
C226 C225 H225 121.7 . . ?
C124 C225 H225 121.7 . . ?
C225 C226 C221 121.6(11) . . ?
C225 C226 H226 119.2 . . ?
C221 C226 H226 119.2 . . ?
C236 C231 C232 116.5(11) . . ?
C236 C231 P2 117.9(7) . . ?
C232 C231 P2 125.5(11) . . ?
C231 C232 C233 121.4(14) . . ?
C231 C232 H232 119.3 . . ?
C233 C232 H232 119.3 . . ?
C234 C233 C232 120.4(11) . . ?
C234 C233 H233 119.8 . . ?
C232 C233 H233 119.8 . . ?
C233 C234 C235 119.5(11) . . ?
C233 C234 H234 120.3 . . ?
C235 C234 H234 120.3 . . ?
C236 C235 C234 117.2(13) . . ?
C236 C235 H235 121.4 . . ?
C234 C235 H235 121.4 . . ?
C231 C236 C235 124.6(11) . . ?
C231 C236 H236 117.7 . . ?
C235 C236 H236 117.7 . . ?
C316 C311 C312 118.7(9) . . ?
C316 C311 P3 119.6(8) . . ?
C312 C311 P3 121.5(8) . . ?
C313 C312 C311 119.6(10) . . ?
C313 C312 H312 120.2 . . ?
C311 C312 H312 120.2 . . ?
C314 C313 C312 121.0(10) . . ?
C314 C313 H313 119.5 . . ?
C312 C313 H313 119.5 . . ?
C313 C314 C315 119.8(10) . . ?
C313 C314 H314 120.1 . . ?
C315 C314 H314 120.1 . . ?
C314 C315 C316 118.4(10) . . ?
C314 C315 H315 120.8 . . ?
C316 C315 H315 120.8 . . ?
C311 C316 C315 121.1(10) . . ?
C311 C316 H316 119.4 . . ?
C315 C316 H316 119.4 . . ?
C322 C321 C326 115.0(9) . . ?
C322 C321 P3 122.3(8) . . ?
C326 C321 P3 122.7(8) . . ?
C321 C322 C323 123.3(12) . . ?
C321 C322 H322 118.4 . . ?
C323 C322 H322 118.4 . . ?
C322 C323 C324 119.1(12) . . ?
C322 C323 H323 120.5 . . ?
C324 C323 H323 120.5 . . ?
C325 C324 C323 119.8(11) . . ?
C325 C324 H324 120.1 . . ?
C323 C324 H324 120.1 . . ?
C324 C325 C326 121.4(13) . . ?
C324 C325 H325 119.3 . . ?
C326 C325 H325 119.3 . . ?
C325 C326 C321 121.0(12) . . ?
C325 C326 H326 119.5 . . ?
C321 C326 H326 119.5 . . ?
C332 C331 C336 119.6(11) . . ?
C332 C331 P3 119.3(10) . . ?
C336 C331 P3 121.0(9) . . ?
C331 C332 C333 120.9(13) . . ?
C331 C332 H332 119.6 . . ?
C333 C332 H332 119.6 . . ?
C334 C333 C332 118.9(11) . . ?
C334 C333 H333 120.5 . . ?
C332 C333 H333 120.5 . . ?
C335 C334 C333 118.3(12) . . ?
C335 C334 H334 120.8 . . ?
C333 C334 H334 120.8 . . ?
C334 C335 C336 124.7(13) . . ?
C334 C335 H335 117.7 . . ?
C336 C335 H335 117.7 . . ?
C335 C336 C331 117.1(11) . . ?
C335 C336 H336 121.4 . . ?
C331 C336 H336 121.4 . . ?
O14 C15 C14 104.1(9) . . ?
O14 C16 C17 104.2(9) . . ?
C16 O14 C15 112.1(10) . . ?

_diffrn_measured_fraction_theta_max    0.387
_diffrn_reflns_theta_full              31.63
_diffrn_measured_fraction_theta_full   0.387
_refine_diff_density_max    0.851
_refine_diff_density_min   -0.802
_refine_diff_density_rms    0.111

#===END
